# Supplementary material
Source: HighWire-hosted journal article supplement (https://jnm.snmjournals.org/highwire/filestream/95180/field_highwire_adjunct_files/0/187625_Supplemental_Data.pdf)
Supplement: 187625_Supplemental_Data.pdf [file 187625_Supplemental_Data.pdf]

## Pharmacokinetic Details

We examined the effect of a single oral dose of 30 or 60 mg/kg JNJ-49146981 on the *in vivo* production of A $\beta$  in brain in non-transgenic Swiss mice or APPPS1-21 mice (4 weeks of age) after oral treatment (n = 6 per time point). Mice were killed by decapitation and blood was collected in EDTA-treated collection tubes. Blood samples were placed immediately on ice and plasma was obtained following centrifugation at 4°C for 10 min at ~1900 g. Samples were stored at -18°C prior to pharmacokinetic analysis. Brains were excised and olfactory lobe and hindbrain were removed. Brain hemispheres were weighed, immediately frozen on dry ice and stored at -20°C or -80°C prior to pharmacokinetic (left hemisphere) or A $\beta$  (right hemisphere) analysis, respectively. Homogenization of brain samples and subsequent analysis of A $\beta$  and compound levels have been described in detail previously (1). Results demonstrated that a single oral dose of 60 mg/kg JNJ-49146981 produced a potent reduction of rodent A $\beta$ 1-40 levels in the brain compared to vehicle-treated mice at 4 and 7 hours after treatment in wild-type mice (Table 1). 24 hours after treatment, rodent A $\beta$ 1-40 levels returned to vehicle values. As it is known from previous studies that the presence of the APP-Swedish mutation reduces potency of BACE inhibitors (2,3), reduction in A $\beta$  levels following a single oral dose of 30 mg/kg was compared in WT and APPPS1-21 mice 2 hours after treatment. Rodent A $\beta$ 1-40 levels were reduced to a similar extent (average 71% and 65% reduction in WT and APPPS1-21 mice, respectively). Human A $\beta$ 1-40 levels in APPPS1-21 mice were reduced to a lesser but still substantial extent (average 49% reduction). Compound levels in brain and plasma were comparable between WT and transgenic mice in this study (brain: average 1031  $\pm$  246 and 840  $\pm$  156 ng/g, respectively; plasma: 663  $\pm$  91 and 706  $\pm$  85 ng/ml, respectively).

## REFERENCES

1. Van Broeck B, Chen JM, Tréton G, et al. Chronic treatment with a novel  $\gamma$ -secretase modulator, JNJ-40418677, inhibits amyloid plaque formation in a

mouse model of Alzheimer's disease. *Br J Pharmacol.* 2011;163:375–389.

2. Eketjäll S, Janson J, Jeppsson F, et al. AZ-4217: a high potency BACE inhibitor displaying acute central efficacy in different in vivo models and reduced amyloid deposition in Tg2576 mice. *J Neurosci.* 2013;33:10075–10084.

3. Yamakawa H, Yagishita S, Futai E, Ishiura S. beta-Secretase inhibitor potency is decreased by aberrant beta-cleavage location of the "Swedish mutant" amyloid precursor protein. *J Biol Chem.* 2010;285:1634–1642.

**Supplemental Table 1.** Pharmacokinetics of a single oral dose (60 mg/kg) of JNJ-49146981 in wild-type mice

| Time point | Average % reduction brain rodent A $\beta$ 1-40 concentration compared to vehicle-treated mice (wild-type) | Average JNJ-49146981 concentrations |              |
|------------|------------------------------------------------------------------------------------------------------------|-------------------------------------|--------------|
|            |                                                                                                            | Plasma (ng/ml)                      | Brain (ng/g) |
| 4 hours    | 85                                                                                                         | 556                                 | 869          |
| 7 hours    | 83                                                                                                         | 520                                 | 807          |
| 24 hours   | -26                                                                                                        | 13                                  | 19           |

**Supplemental Table 2** The source and dilution of the primary antibodies used in the study

| Antibody | Source                                    | Dilution |
|----------|-------------------------------------------|----------|
| 4G8      | Biologend, San Diego, USA (SIG-39220)     | 1/2000   |
| GFAP     | Millipore, Temecula, USA (IF03L)          | 1/750    |
| Iba1     | Wako chemicals, Richmond, USA (019-19741) | 1/750    |
| NeuN     | Millipore, Temecula, USA (MAB377)         | 1/2000   |

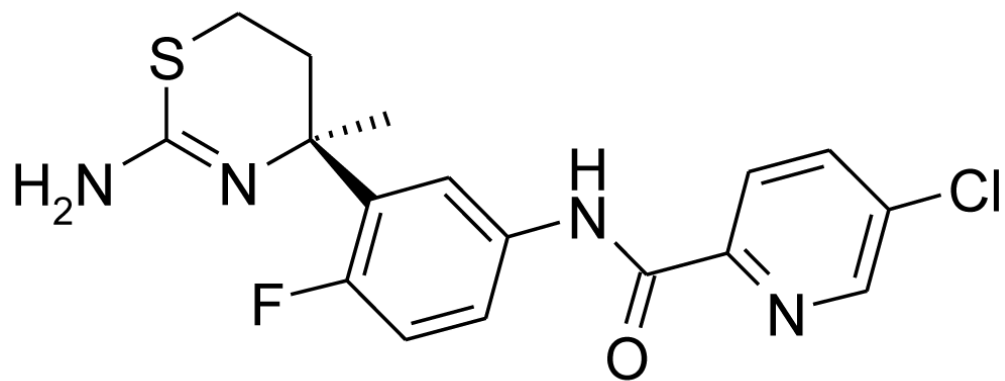

**Supplemental Figure 1.** Chemical structure of the BACE inhibitor JNJ-49146981

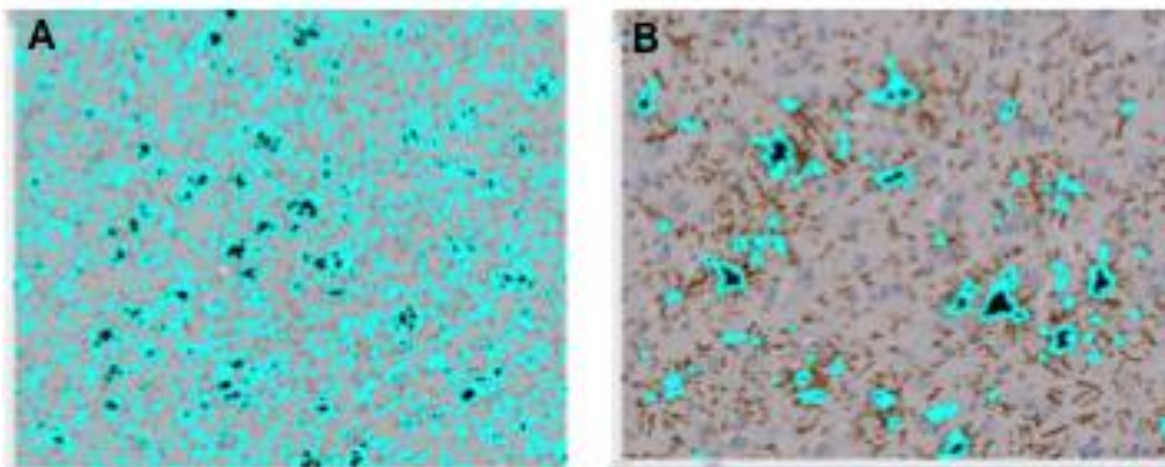

**Supplemental Figure 2.** Quantification of Iba-1 staining. (A) Quantification of both resting and active microglia when a low threshold is employed. (B) Quantification of activated microglia only using a higher threshold for detection.

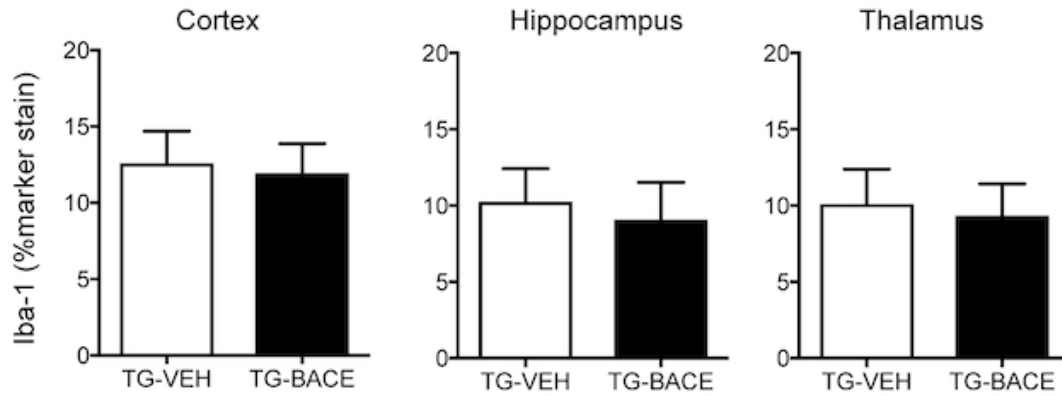

**Supplemental Figure 3.** Quantification of Iba-1 staining with a low threshold. Data are presented as mean + standard deviation.

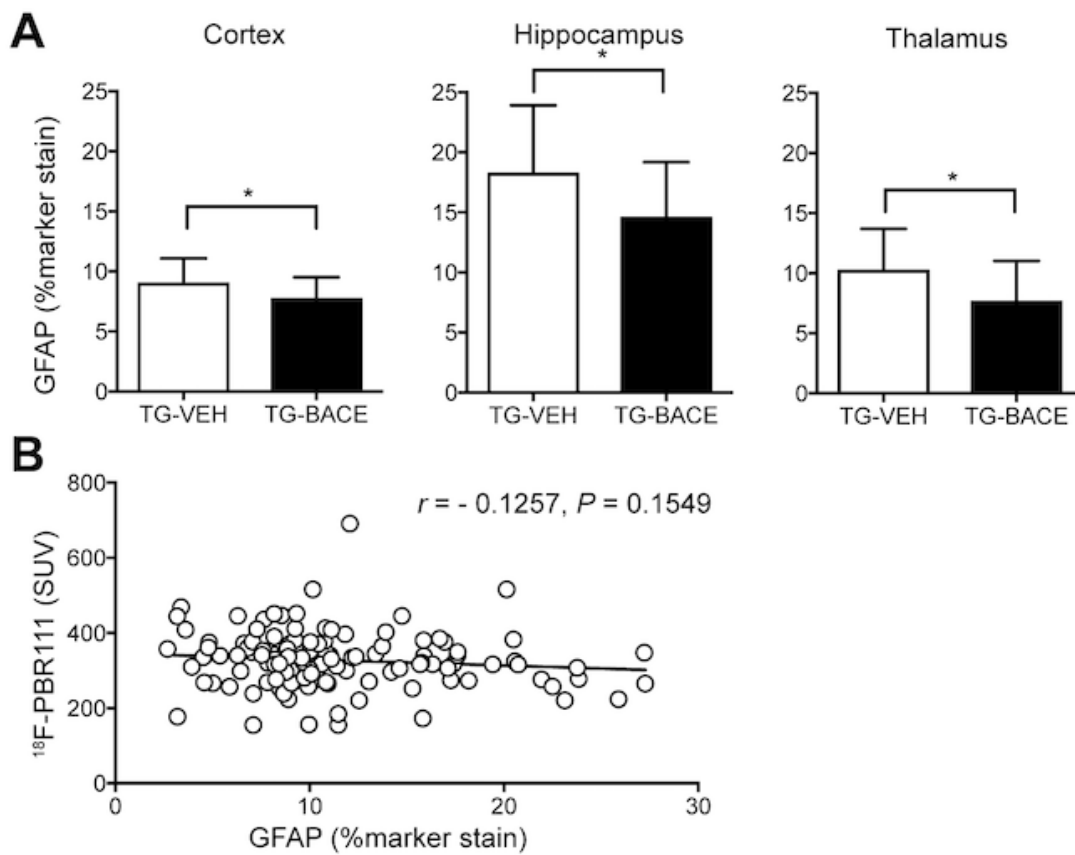

**Supplemental Figure 4.** Quantification of GFAP staining (A) and correlation to <sup>18</sup>F-PBR111 in TG mice (B). Data are presented as the mean + standard deviation in A.

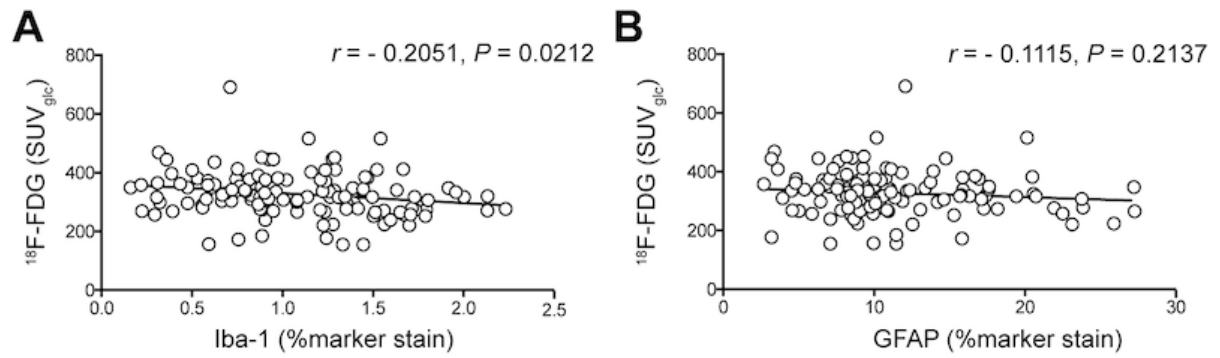

**Supplemental Figure 5.** Correlation of  $^{18}\text{F}$ -FDG uptake to Iba-1 (A) and GFAP (B) in TG mice.
